# Supplementary material for: Expression and Differential Responsiveness of Central Nervous System Glial Cell Populations to the Acute Phase Protein Serum Amyloid A
Source: Sci Rep. 2017 Sep 22;7:12158. doi: 10.1038/s41598-017-12529-7 (PMC5610307; doi:10.1038/s41598-017-12529-7)
Supplement: Supplementary file 1 — Supplementary Information [file 41598_2017_12529_MOESM1_ESM.pdf]

## **Supplementary Information**

### **Expression and Differential Responsiveness of Central nervous System Glial Cell Populations to the Acute Phase Protein Serum Amyloid A**

Massimo Barbierato, Mila Borri, Laura Facci, Morena Zusso, Stephen D. Skaper and  
Pietro Giusti

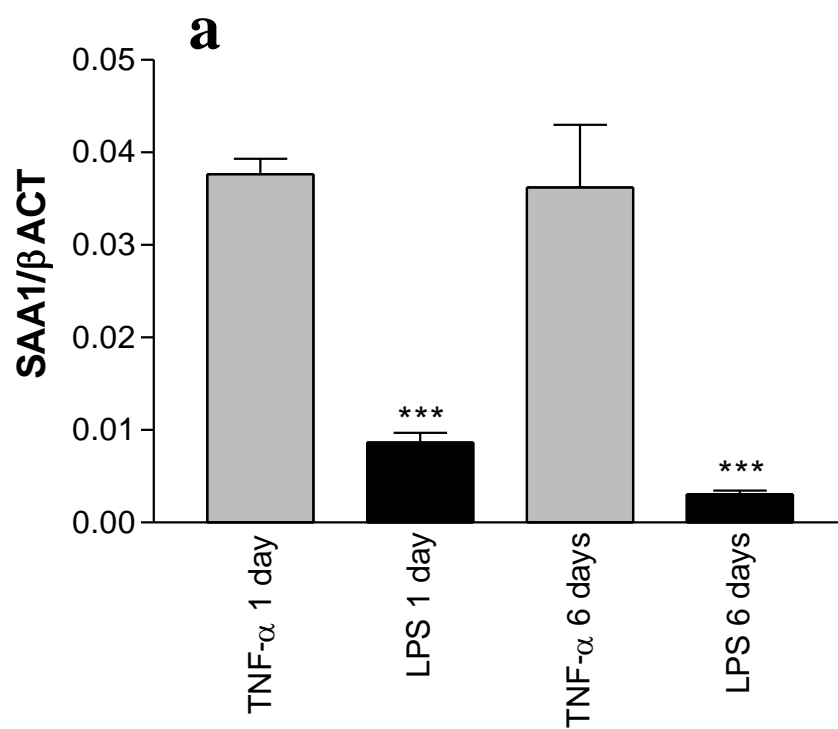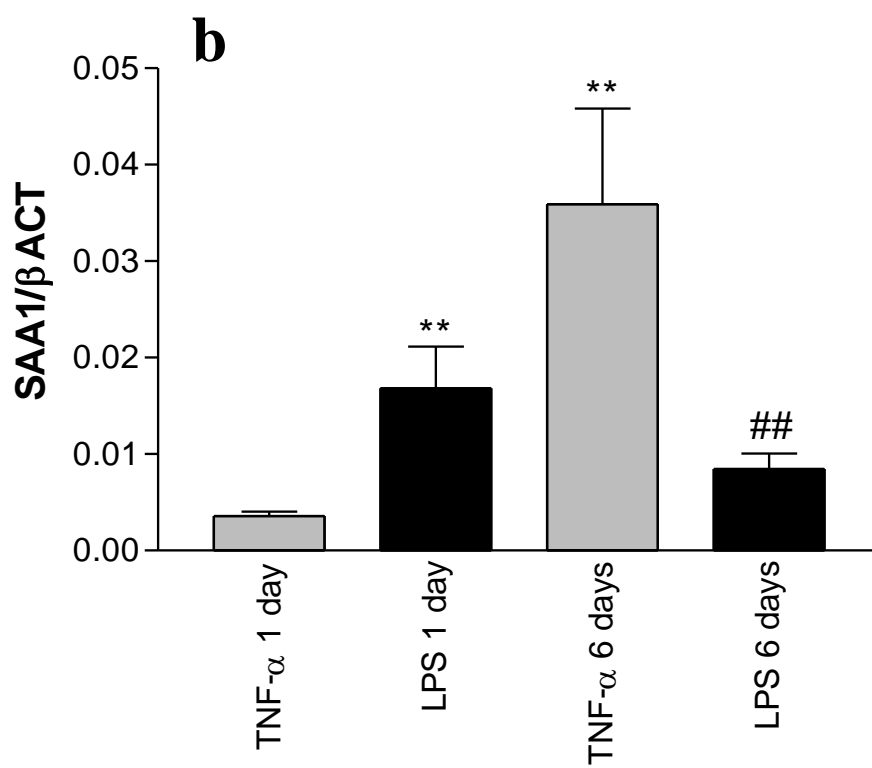

**Supplementary Figure S1.** Purified rat cortical microglia **(a)** and enriched astrocytes **(b)** display differential timings in expression of mRNA for *Saa1* in response to treatment with TNF- $\alpha$  or LPS. Cultures were treated the day after plating (DMEM + 0.5% FCS) with 10 ng/ml TNF- $\alpha$  or 100 ng/ml LPS and processed 1 and 6 days later for qRT-PCR, as detailed in Methods. Data are presented as relative expression level (normalized with respect to  $\beta$ -actin ( $\beta$ ACT)) at each time point and are means + s.e.m. n=6 (n=3 for microglia at 6 days). **(a)** \*\*\*p<0.001 vs LPS at 1 day and 6 days, respectively. **(b)** \*\*p<0. vs TNF- $\alpha$  at 1 day; ##p<0.01 vs TNF- $\alpha$  at 6 days. Expression values for control (untreated cells have been omitted, owing to their very low levels (<0.001)).

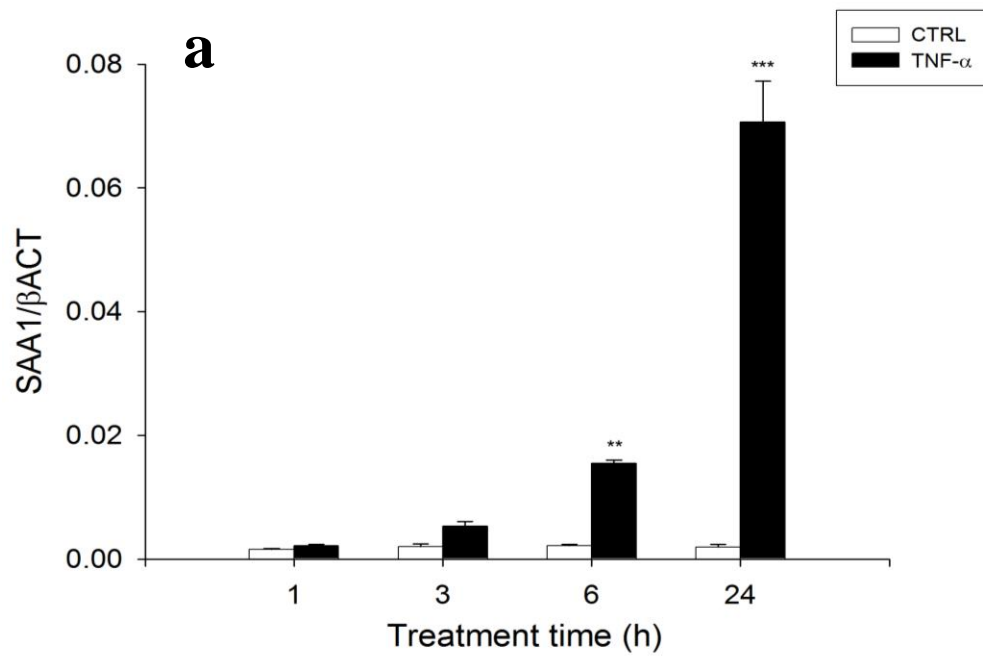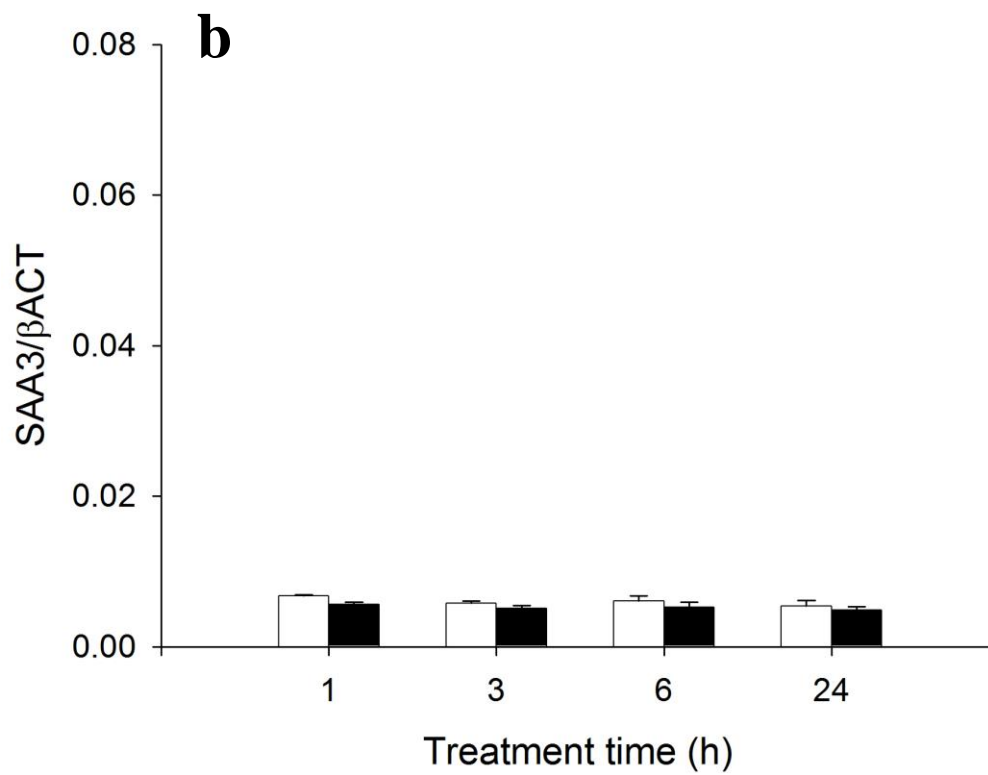

**Supplementary Figure S2.** Treatment of rat cortical OPCs with TNF- $\alpha$  up-regulates, in a time-dependent manner mRNA for *Saa1* but not *Saa3*. **(a)** SAA1; **(b)** SAA3. Cultures of OPCs were treated the day after plating (Sato medium) with 10 ng/ml TNF- $\alpha$  and processed 1, 3, 6 and 24 h later for qRT-PCR, as detailed in Methods. Data are presented as relative expression level (normalized with respect to  $\beta$ -actin ( $\beta$ ACT)) at each time point and are means + s.e.m. n=3. \*\*p<0.01 vs control (CTRL); \*\*\*p<0.001 vs control.

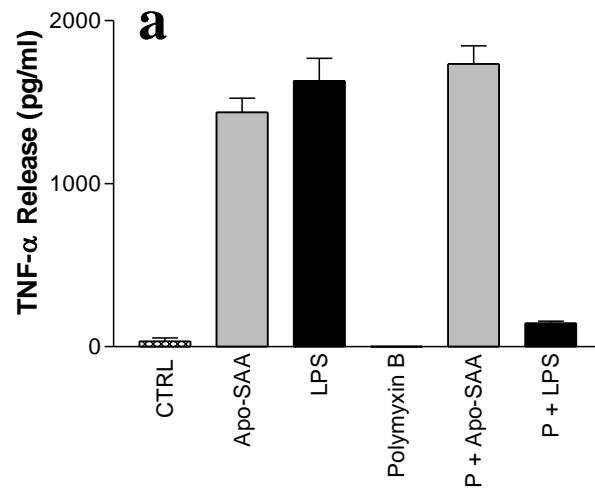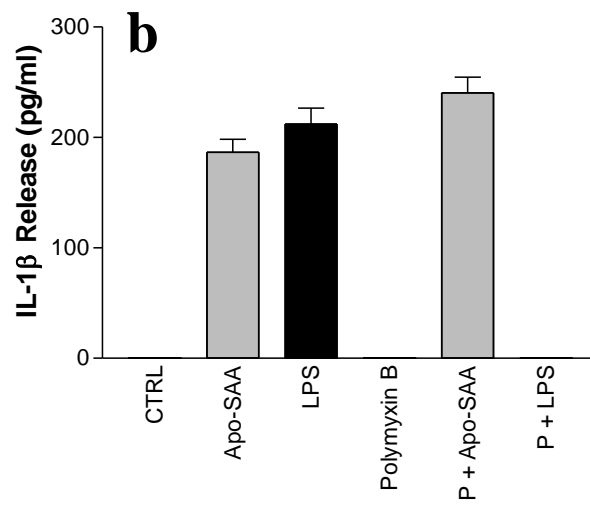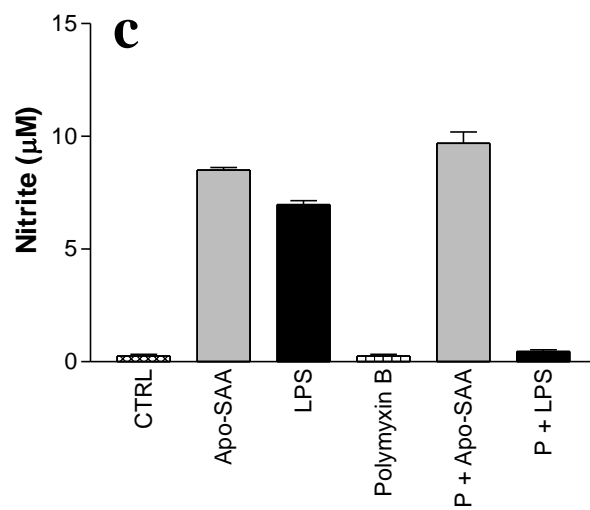

**Supplementary Figure S3.** Polymyxin B blocks the effect of LPS, but not apo-SAA, on stimulation of inflammatory mediator release from rat cortical microglia. Cultures were treated the day after plating (DMEM + 0.5% FCS) with with polymyxin B ('P') (10 µg/ml) followed 30 min later by 1.5 µg/ml recombinant human Apo-SAA (Apo-SAA) or 100 ng/ml LPS and culture medium collected 24 h later for measurement of **(a)** TNF- $\alpha$  and **(b)** IL-1 $\beta$  by ELISA, or **(c)** NO by Griess reaction. Data are expressed as means  $\pm$  s.e.m. n=3.
